# Supplementary figures and images for: Determination of hematocrit by voltage-induced hemolysis on a disposable electrochemical sensing strip
Source: Royal Society of Chemistry journal article supplement (doi:10.1039/c5an01251a), 2015-01-01

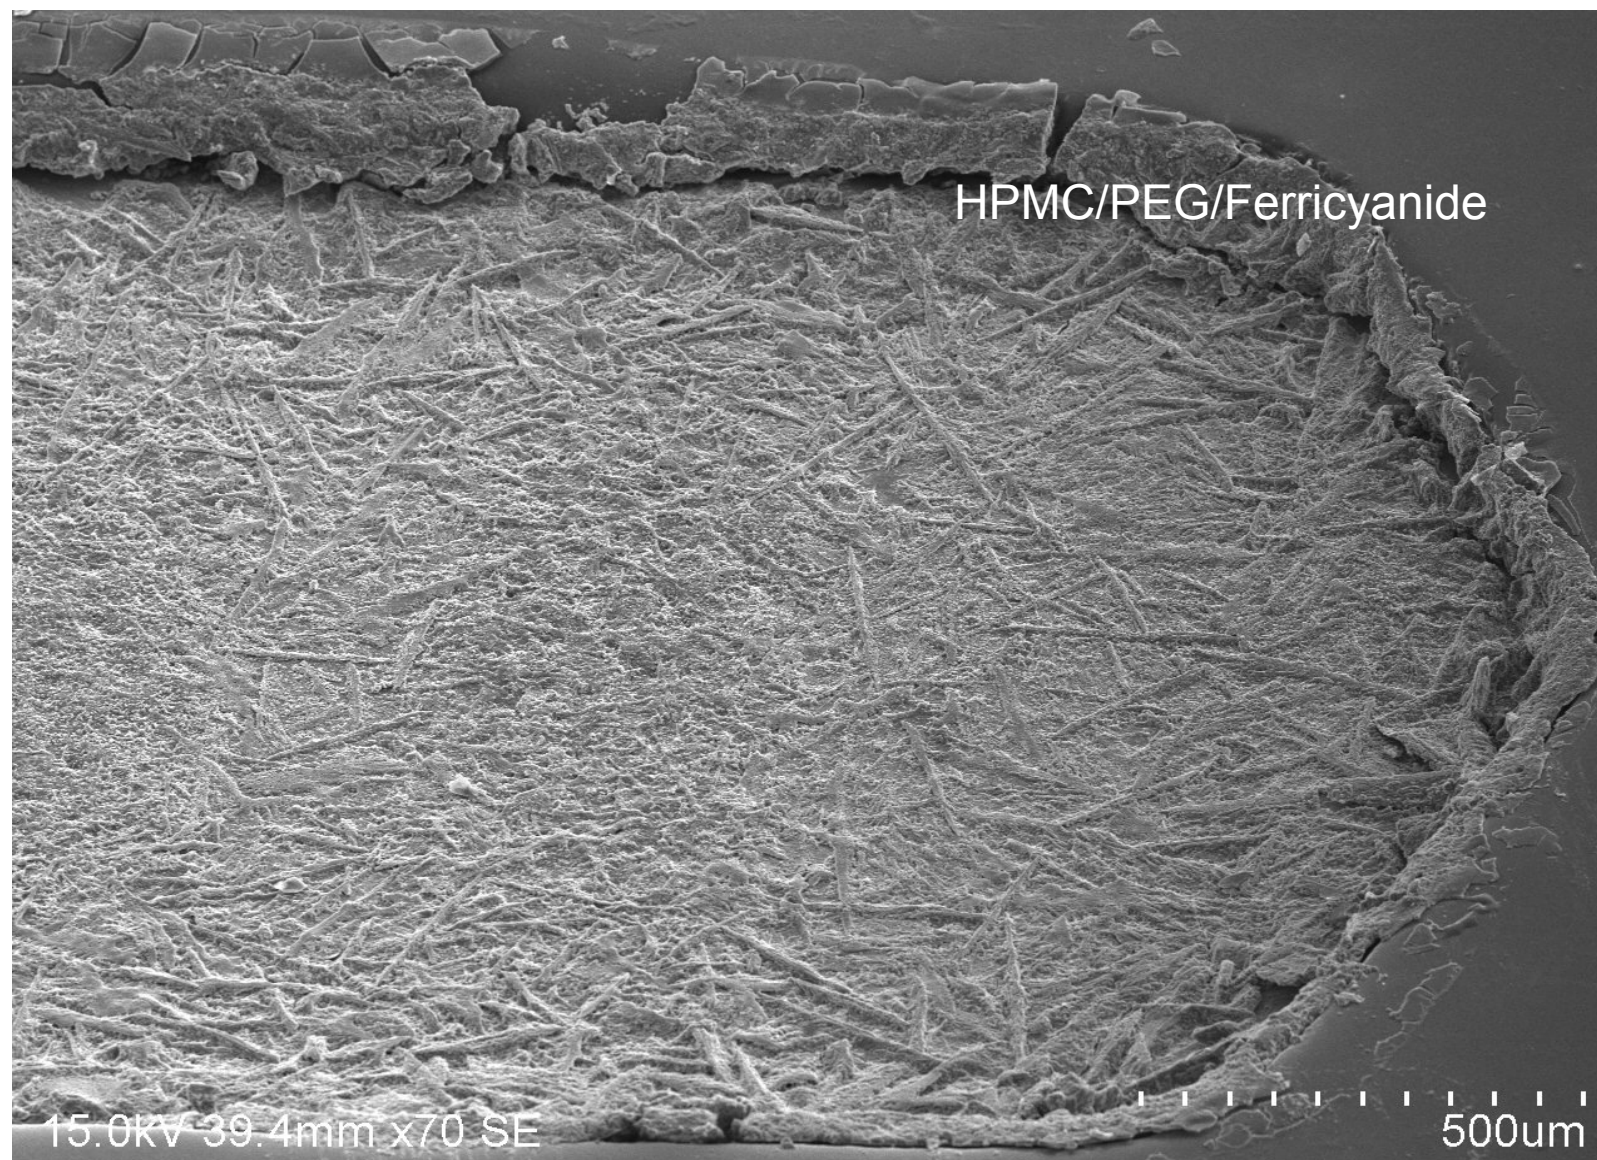

Electron micrograph of the screen-printed modified electrode surface

Supplement: c5an01251a1.pdf [file c5an01251a1.pdf]
